# Supplementary material for: Visual Function and Neuropsychological Profiling of Idiopathic Infantile Nystagmus
Source: MDPI journal article supplement (doi:10.3390/brainsci13091348), 2023-09-20
Supplement: s1 [file s1]

**Supplementary Table S1.** Clinical and diagnostic evaluations. ERG: electroretinogram. VEP: visual evoked potential. OCT: optical coherence tomography. MRI: magnetic resonance imaging.

| Diagnostic exams         | N=60     | Results                                       | n      | % of performed |     |
|--------------------------|----------|-----------------------------------------------|--------|----------------|-----|
| ERG                      | 47 (80%) | Normal                                        | 42     | 89             |     |
|                          |          | Not interpretable due to scarce collaboration | 5      | 11             |     |
| VEPs                     | 53 (88%) | Normal                                        | 15     | 28             |     |
|                          |          | Aspecific alterations                         | 38     | 72             |     |
| OCT                      | 0        | /                                             | /      | /              |     |
| Brain MRI                | 24 (40%) | Normal                                        | 24     | 100            |     |
| Genetic testing          | 23 (38%) | Negative                                      | 12     | 52             |     |
|                          |          | Ongoing                                       | 5      | 22             |     |
|                          |          | FRMD7                                         | 6      | 26             |     |
| Ophthalmologic follow-up | 60 (100) | Anterior segment                              | Normal | 60             | 100 |
|                          |          | Eye lens                                      | Normal | 60             | 100 |
|                          |          | Fundus oculi                                  | Normal | 60             | 100 |
| Neuropediatric follow-up | 60 (100) | Normal                                        | 60     | 100            |     |

**Supplementary Table S2.** Cognitive test performed and results according to scoring rules of each test. A total of 27 patients (17 M, 10 F, mean age: 9.5 y, range: 4.3-17.8 y) underwent the cognitive assessment as explained in the methods section, according to their age. Wechsler preschool and primary scale of intelligence, fourth edition (WPPSI-IV); verbal comprehension index (VCI); visual-spatial index (VSI); fluid reasoning index (FRI); working memory index (WMI); processing speed index (PSI); and full-scale IQ (FSIQ). Wechsler preschool and primary scale of intelligence, third edition: verbal comprehension index (VCI); performance index (PI); processing speed index (PSI); and total intelligence quotient (TIQ). Wechsler intelligence scale for children (WISC-IV) and Wechsler adult intelligence scale (WAIS-IV): verbal comprehension index (VCI); perceptual reasoning index (PRI); working memory index (WMI); processing speed index (PSI); and intelligence quotient (IQ).

| <b>IQ test<br/>(n=27)</b> | <b>Index</b> | <b>Performed n<br/>(%)</b> | <b>Not interpretable<br/>(%)</b> | <b>Index &lt;85 (% of<br/>performed)</b> | <b>Index ≥85 (% of<br/>performed)</b> |
|---------------------------|--------------|----------------------------|----------------------------------|------------------------------------------|---------------------------------------|
| <b>WPPSI-IV (n=2)</b>     | VCI          | 2 (100)                    | 0                                | 0                                        | 2 (100)                               |
|                           | VSI          | 2 (100)                    | 0                                | 0                                        | 2 (100)                               |
|                           | FRI          | 2 (100)                    | 0                                | 0                                        | 2 (100)                               |
|                           | WMI          | 2 (100)                    | 0                                | 0                                        | 2 (100)                               |
|                           | PSI          | 2 (100)                    | 0                                | 0                                        | 2 (100)                               |
|                           | FSIQ         | 2 (100)                    | 0                                | 0                                        | 2 (100)                               |
| <b>WPPSI-III (n=5)</b>    | VCI          | 5 (100)                    | 0                                | 0                                        | 5 (100)                               |
|                           | PRI          | 5 (100)                    | 0                                | 0                                        | 5 (100)                               |
|                           | PSI          | 4 (80)                     | 1 (20)                           | 0                                        | 4 (100)                               |
|                           | IQ           | 5 (100)                    | 0                                | 0                                        | 5 (100)                               |
| <b>WISC-IV (n=18)</b>     | VCI          | 18 (100))                  | 0                                | 0                                        | 18 (100)                              |
|                           | PRI          | 18 (100)                   | 0                                | 0                                        | 18 (100)                              |
|                           | WMI          | 17 (94)                    | 1 (6)                            | 1 (6)                                    | 16 (94)                               |
|                           | PSI          | 18 (100)                   | 0                                | 5 (28)                                   | 13 (72)                               |
|                           | IQ           | 15 (83)                    | 3 (17)                           | 1 (7)                                    | 14 (93)                               |
| <b>WAIS-IV (n=2)</b>      | VCI          | 2(100)                     | 0                                | 0                                        | 2 (100)                               |
|                           | PRI          | 2 (100)                    | 0                                | 0                                        | 2 (100)                               |
|                           | WMI          | 2 (100)                    | 0                                | 0                                        | 2 (100)                               |
|                           | PSI          | 2 (100)                    | 0                                | 0                                        | 2 (100)                               |
|                           | IQ           | 2 (100)                    | 0                                | 0                                        | 2 (100)                               |
